# Supplementary material for: UCHL1 provides diagnostic and antimetastatic strategies due to its deubiquitinating effect on HIF-1α
Source: PubMed Central journal article supplement (PMC4317501; doi:10.1038/ncomms7153), 2015-01-23
Supplement: ncomms7153-s1.pdf [file ncomms7153-s1.pdf]

## Supplementary Figure 1

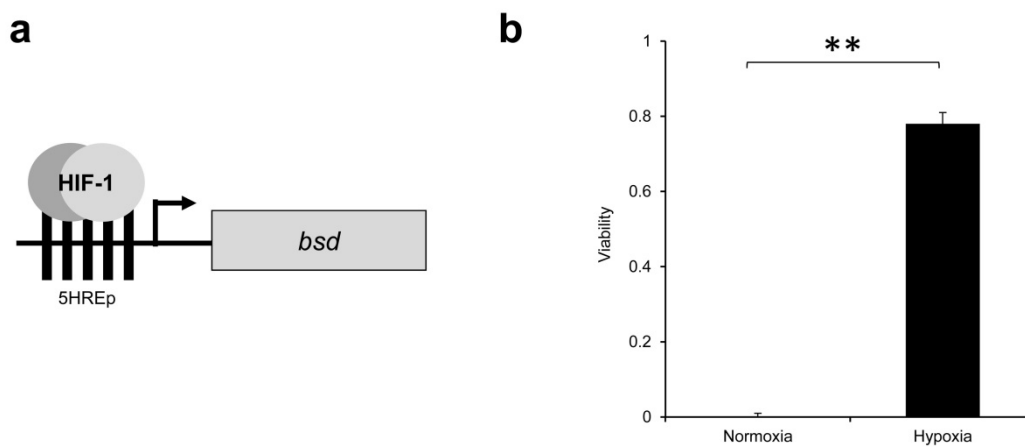

### Supplementary Figure 1. Screening for novel genes responsible for the activation of HIF-1.

(a) Schematic diagram of the p5HREp-bsd plasmid that expressed the blasticidin S-resistant gene (*bsd*) in a HIF-1-dependent manner. (b) NIH3T3/5HRE-BSD cells were cultured under normoxic (20%) and hypoxic (0.1%) conditions with 10  $\mu$ M blasticidin S for 24 h. The fraction of surviving cells was quantified by Cell Count Reagent SF (Nacalai Tesque) according to the manufacturer's instructions. Mean  $\pm$  s.d. n = 3, \*\*p < 0.01 (Student's *t*-test between the indicated groups).

## Supplementary Figure 2

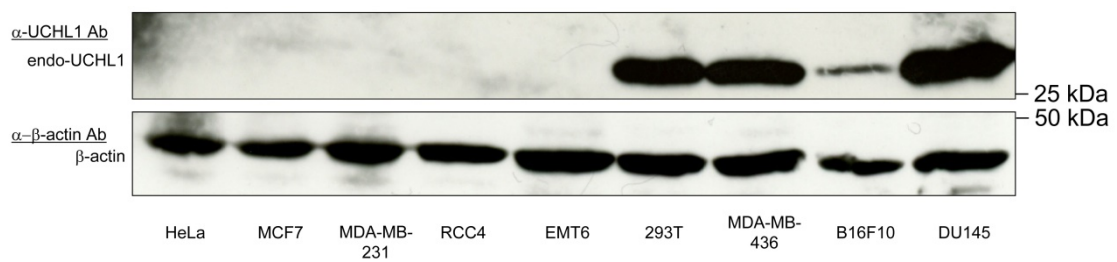

**Supplementary Figure 2. Endogenous expression levels of UCHL1 in various cancer cell lines.** Twenty-four hours after seeding the indicated cells, cell lysates were harvested and subjected to Western blotting with anti-UCHL1 (upper) and anti-β-actin (lower) antibodies.

### Supplementary Figure 3

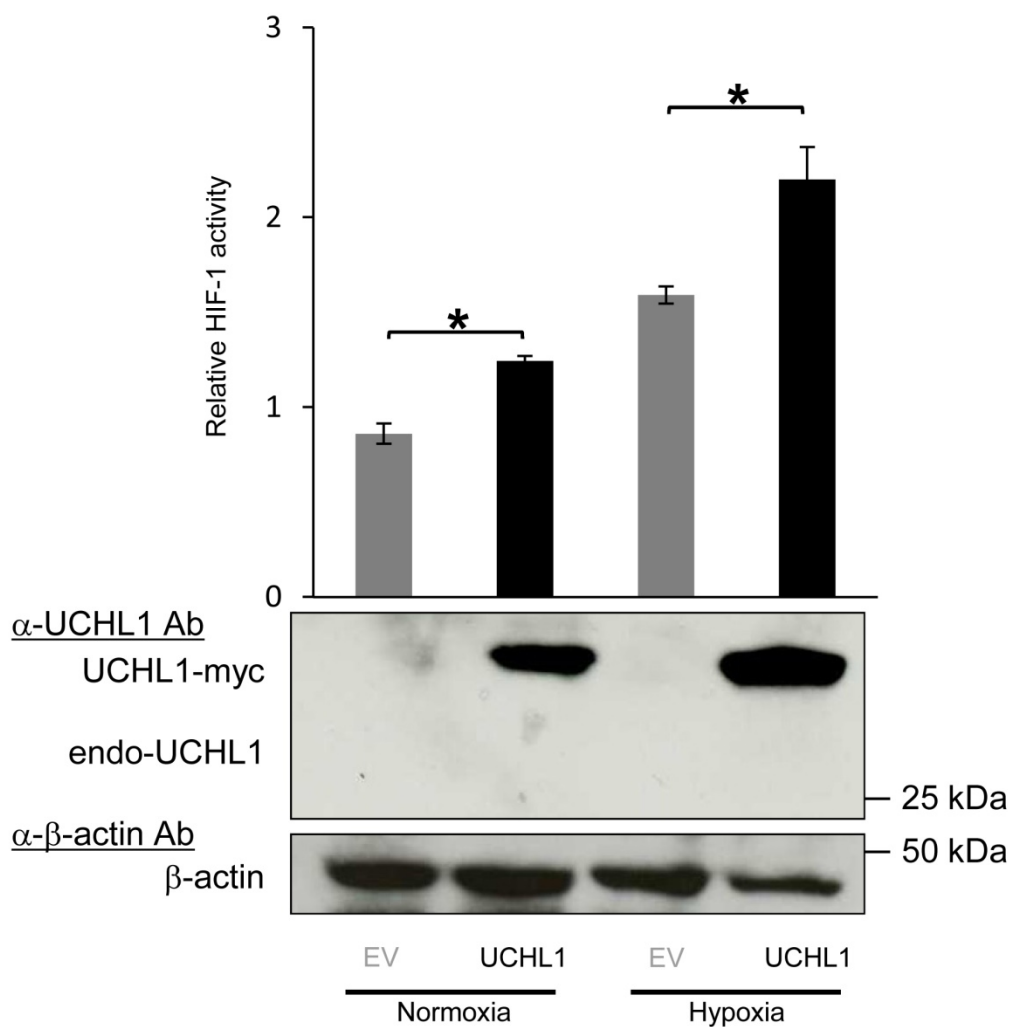

**Supplementary Figure 3. Activation of HIF-1 activity by UCHL1 overexpression.** MDA-MB-231/5HRE-Luc cells were transfected with the UCHL1-expression vector, pcDNA4/UCHL1 (UCHL1), or its empty vector, pcDNA4/myc-His A (EV), cultured under normoxic (20%) or hypoxic (1%) conditions for 24 h, and subjected to Western blotting using the indicated antibodies and the luciferase assay. Mean  $\pm$  s.d. n = 3, \*p < 0.05, \*\*p < 0.01 (Student's *t*-test between the 2 indicated groups).

## Supplementary Figure 4

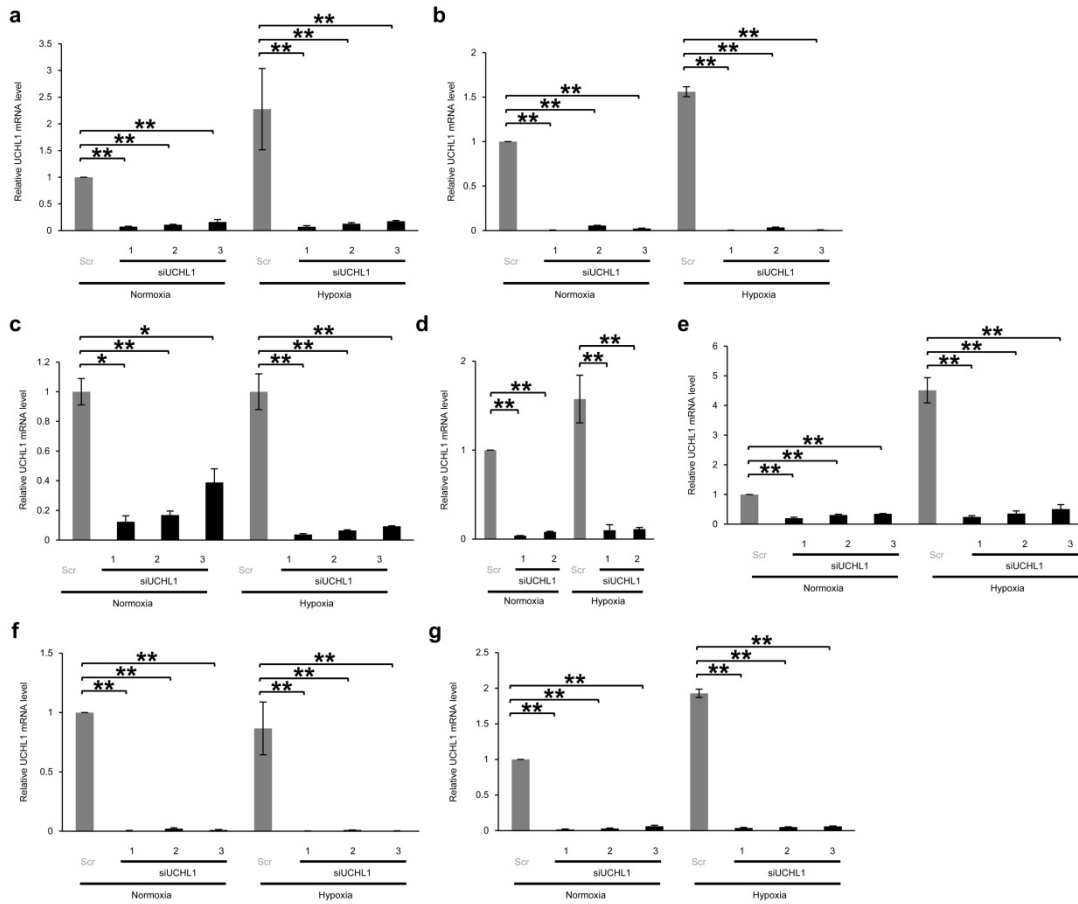

**Supplementary Figure 4. Efficiency of UCHL1 knockdown.** The efficiency of UCHL1 knockdown in HEK293T/5HRE-Luc cells in the experiment in Figure 1c (a), MDA-MB-436/5HRE-Luc cells in that of Figure 1c (b), HEK293T cells in that of Figure 1e and Supplementary Fig. 7 (c), HEK293T cells in that of Figure 2b (d), HEK293T cells in that of Figure 2d left (e), MDA-MB-436 cells in that of Figure 2d right (f), and DU145 cells in that of Supplementary Fig. 5 (g) were quantified by qRT-PCR. Mean  $\pm$  s.d. n = 3, \*p < 0.05, \*\*p < 0.01 (Student's *t*-test between the 2 indicated groups).

## Supplementary Figure 5

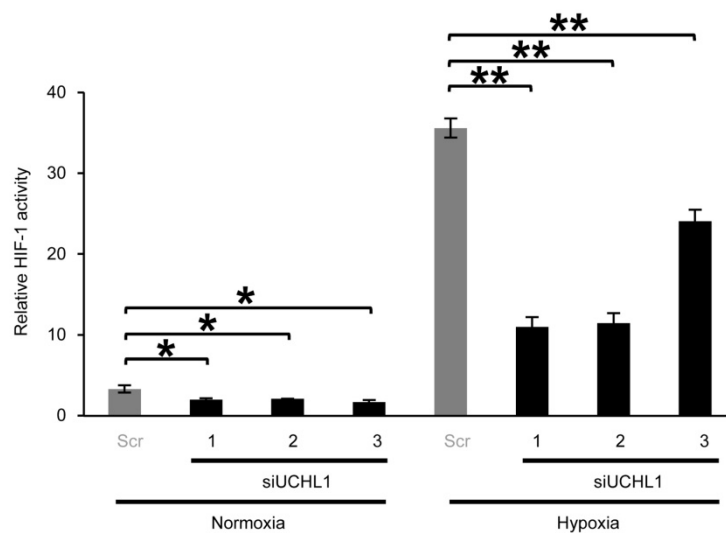

**Supplementary Figure 5. Suppression of HIF-1 activity by UCHL1 knockdown.** DU145 cells were transfected with a plasmid encoding the *5HREp-luc* plasmid for 24 h, and treated with scramble- (Scr) or UCHL1-siRNA (siUCHL1), cultured under normoxic (20%) or hypoxic (1%) conditions for 24 h, and then subjected to the luciferase assay. Mean  $\pm$  s.d. n = 3, \*p < 0.05, \*\*p < 0.01 (Student's *t*-test between the 2 indicated groups).

## Supplementary Figure 6

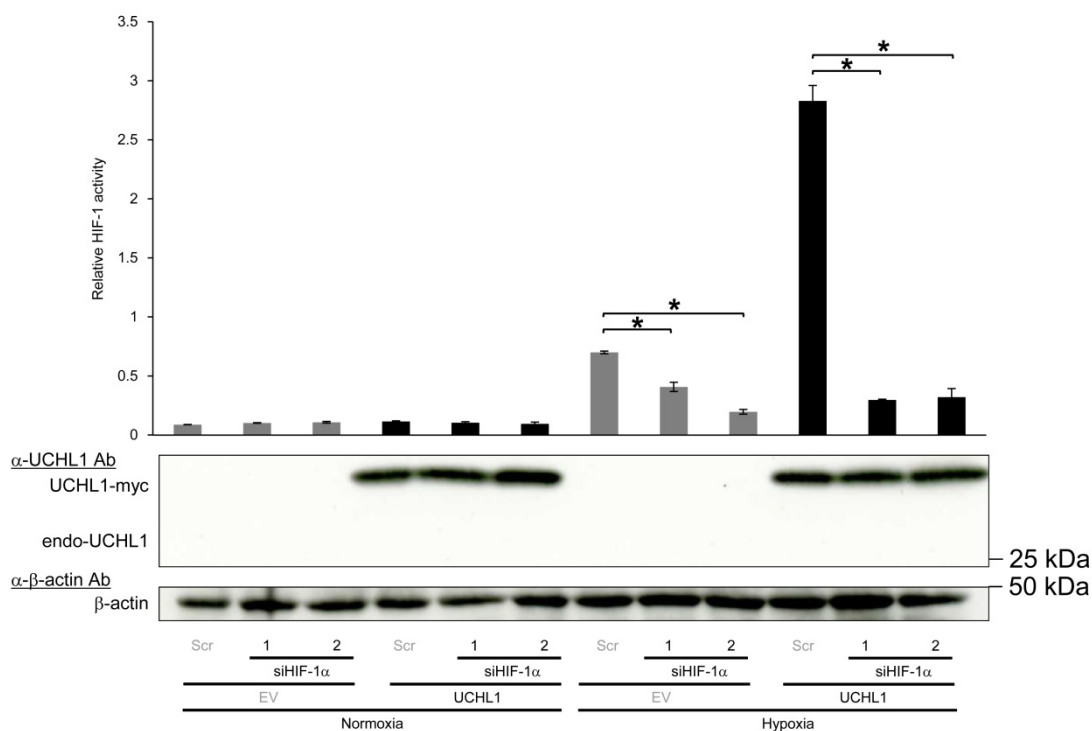

**Supplementary Figure 6. Involvement of HIF-1 $\alpha$  in UCHL1-dependent upregulation of 5HRE-luc reporter activity.** HeLa/5HRE-Luc cells were transfected with the UCHL1-expression vector, pcDNA4/UCHL1 (UCHL1) or its empty vector, pcDNA4/myc-His A (EV), treated with either scramble- (Scr) or HIF-1 $\alpha$ -siRNA (siHIF-1 $\alpha$ ), cultured under normoxic (20%) or hypoxic (1%) conditions for 24 h, and then subjected to Western blotting using the indicated antibodies and luciferase assay. Mean  $\pm$  s.d. n = 3, \*p < 0.05 (Student's *t*-test between the 2 indicated groups).

## Supplementary Figure 7

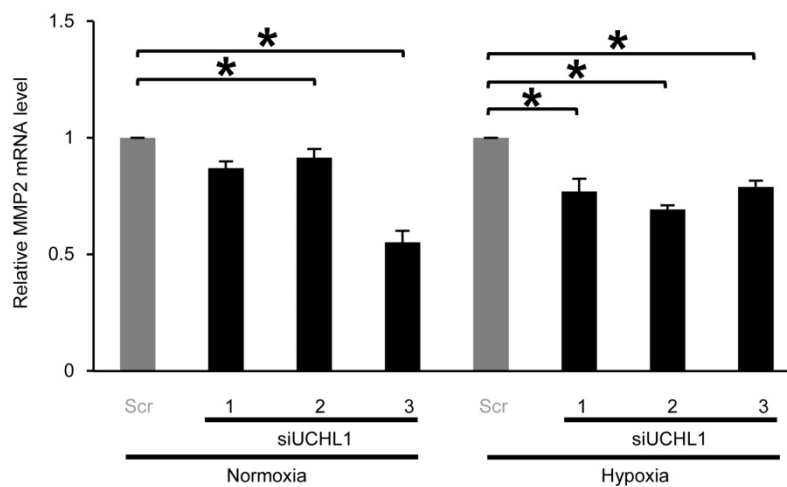

**Supplementary Figure 7. Decrease in HIF-1-downstream gene expression by UCHL1 knockdown.** 293T cells, which originally showed the high endogenous expression of UCHL1, were transfected with either scramble- (Scr) or UCHL1-siRNA (siUCL1), cultured under normoxic (20%) or hypoxic (1%) conditions for 24 h, and then subjected to qRT-PCR to quantify *MMP2* mRNA levels. Mean  $\pm$  s.d. n = 3, \*p < 0.05 (Student's *t*-test between the 2 indicated groups).

## Supplementary Figure 8

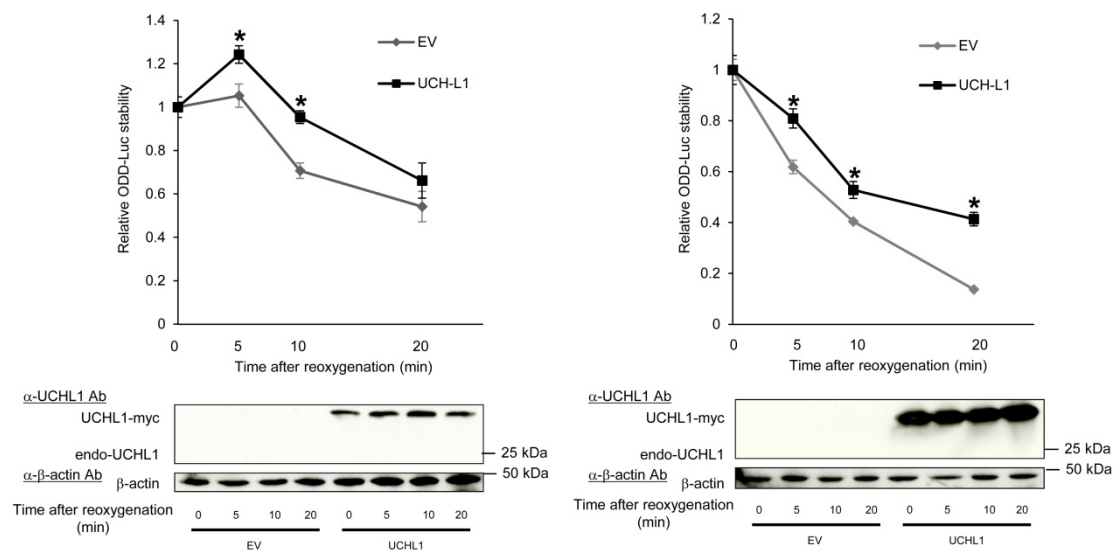

### Supplementary Figure 8. Prolonged HIF-1α half-life by UCHL1 overexpression.

HeLa/ODD-Luc (left) and MCF7/ODD-Luc (right) cells were transfected with the UCHL1-expression vector, pcDNA4/UCHL1 (UCHL1) or its empty vector, pcDNA4/myc-His A (EV), cultured under hypoxic conditions (1%) for 24 h, and treated with cycloheximide (10 μg/mL) under normoxic conditions (20%). After the reoxygenation treatment for the indicated period, cells were subjected to Western blotting using the indicated antibodies and luciferase assay. Mean ± s.d. n = 3, \*p < 0.05 (Student's *t*-test between the 2 indicated groups).



## Supplementary Figure 9

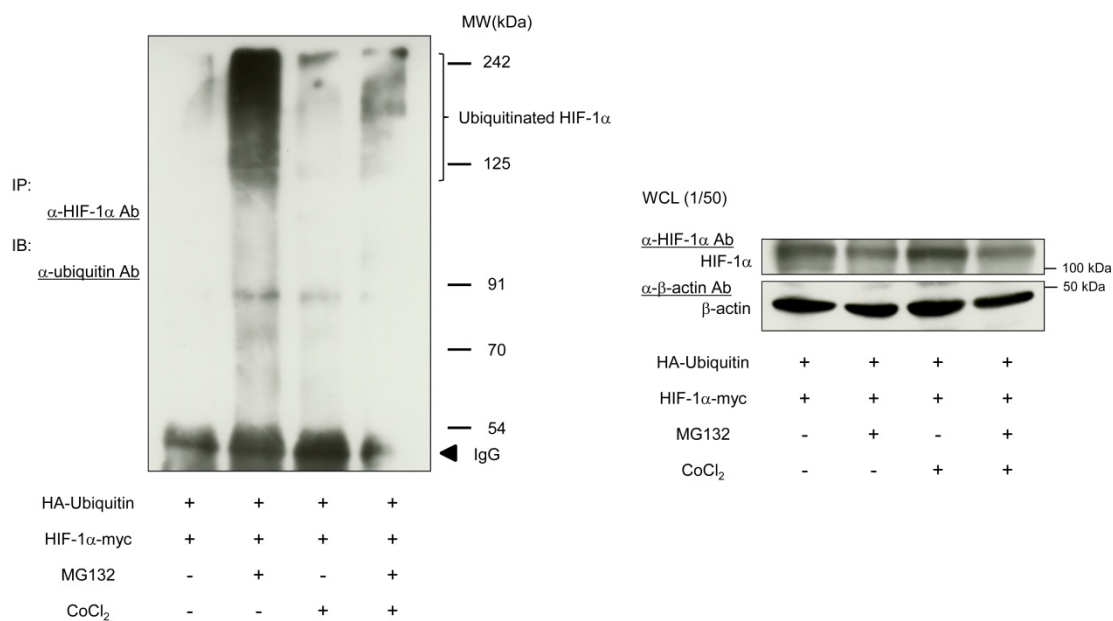

**Supplementary Figure 9. Quantitative analysis of the ubiquitination of HIF-1 $\alpha$ .** 293T cells, which originally showed the high endogenous expression of UCHL1, were transiently transfected with the expression vector for HIF-1 $\alpha$ , pcDNA4A/HIF-1 $\alpha$ -myc, and the expression vector for HA-tagged ubiquitin, pMT132, and were then treated with the indicated combination of the proteasome inhibitor, MG132 (30  $\mu$ M), and PHD inhibitor, CoCl<sub>2</sub> (800  $\mu$ g/mL), under normoxic conditions (20%) for 24 h. Cell lysates were used for immunoprecipitation with the anti-HIF-1 $\alpha$  antibody and subjected to Western blotting with the anti-ubiquitin antibody. One fiftieth of the whole cell lysate (WCL) was subjected to Western blotting with the indicated antibodies.

## Supplementary Figure 10

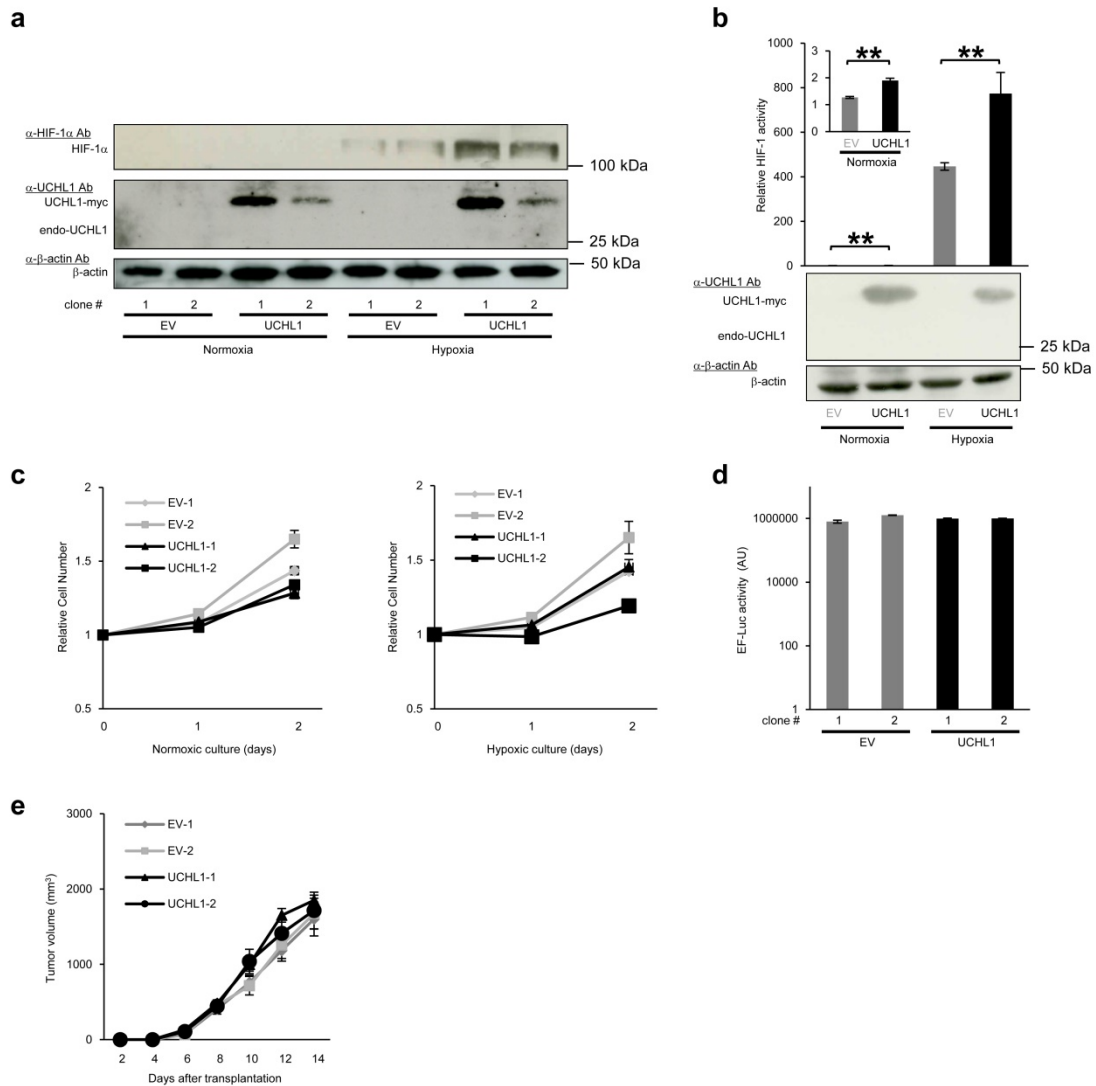

**Supplementary Figure 10. Characterization of EMT6/EF-Luc/UCHL1 and EMT6/EF-Luc/EV stable transfectants.** (a) EMT6/EF-Luc/EV-1, 2 and EMT6/EF-Luc/UCHL1-1, 2 cells were cultured under normoxic (20%) and hypoxic (0.1%) conditions for 24 h, and then subjected to Western blotting with the indicated antibodies. (b) EMT6/5HRE-Luc cells were transfected with the UCHL1-expression vector, pcDNA4/UCHL1 (UCHL1) or its empty vector, pcDNA4/myc-His A (EV), cultured under normoxic (20%) or hypoxic (1%) conditions for 24 h, and then subjected to Western blotting using the indicated

antibodies and luciferase assay. Mean  $\pm$  s.d.  $**p < 0.01$ . (Student's *t*-test between the 2 indicated groups) (c) EMT6/EF-Luc/EV-1, 2 and EMT6/EF-Luc/UCHL1-1, 2 cells were cultured under normoxic (20%) and hypoxic (1%) conditions for the indicated period. The growth of cells was monitored with Cell Count Reagent SF (Nacalai Tesque) according to the manufacturer's instructions. (d) Twenty-four hours after seeding the stable transfectants, EMT6/EF-Luc/EV-1, 2, and EMT6/EF-Luc/UCHL1-1, 2 cells, cells were subjected to the luciferase assay.  $n = 3$ , Mean  $\pm$ s.d. (e) The growth of the tumor xenografts was monitored after the subcutaneous transplantation of the EMT6/EF-Luc/EV-1, 2 and EMT6/EF-Luc/UCHL1-1, 2 cell suspensions ( $3 \times 10^5$  cell/mouse) into the right legs of athymic nude mice. The tumor volume was calculated as  $0.5 \times \text{length} \times \text{width}^2$ .  $n = 6$ .

## Supplementary Figure 11

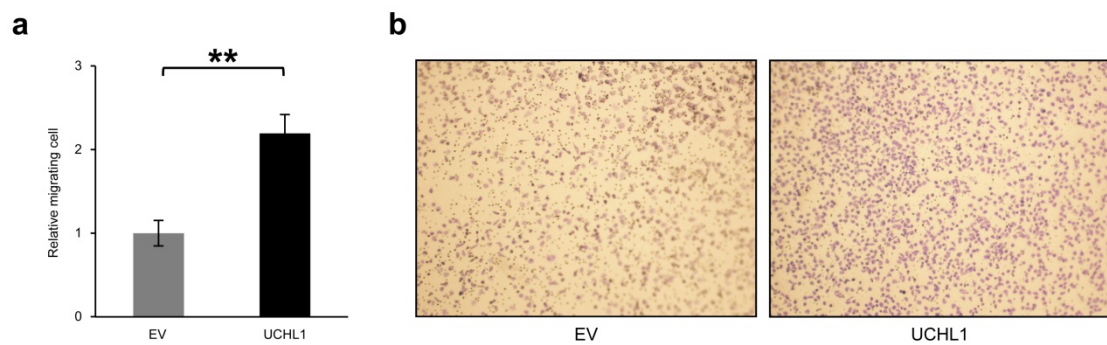

**Supplementary Figure 11. Transwell migration assay with or without UCHL1 overexpression.** The transwell migration assay using EMT6/EF-Luc/EV (EV) and EMT6/EF-Luc/ /UCHL1 (UCHL1) cells. Mean  $\pm$  s.d.  $n = 4$ ,  $*p < 0.05$  (Student's  $t$ -test between the 2 indicated groups). Representative images are shown in **b**.

## Supplementary Figure 12

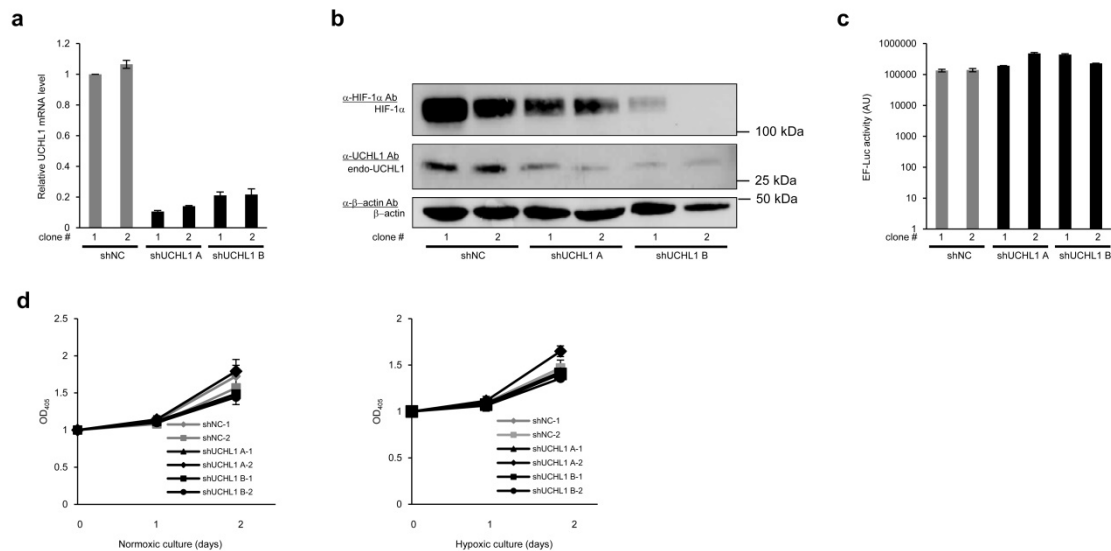

**Supplementary Figure 12. Characterization of B16F10/EF-Luc/shUCHL1 and B16F10/EF-Luc/shNC stable transfectants.** (a) B16F10/EF-Luc/shNC-1, 2 and B16F10/EF-Luc/shUCHL1 A-1, 2, B-1, and 2 cells were cultured under normoxic (20%) conditions for 24 h, and then subjected to qRT-PCR to quantify UCHL1 mRNA levels. Mean  $\pm$  s.d. n = 3. (Student's *t*-test between the 2 indicated groups) (b) B16F10/EF-Luc/shNC-1, 2 and B16F10/EF-Luc/shUCHL1 A-1, 2, B-1, and 2 cells were cultured under hypoxic conditions (0.1%) for 24 h, and then subjected to Western blotting with the indicated antibodies. (c) Twenty-four hours after seeding stable transfectants, cells were subjected to the luciferase assay. (d) B16F10/EF-Luc/shNC-1, 2 and B16F10/EF-Luc/shUCHL1 A-1, 2, B-1, 2 cells were cultured under normoxic (20%) and hypoxic (1%) conditions for the indicated period. The growth of these cells was monitored with Cell Count Reagent SF (Nacalai Tesque) according to the manufacturer's instructions. n = 3, Mean  $\pm$ s.d.

## Supplementary Figure 13

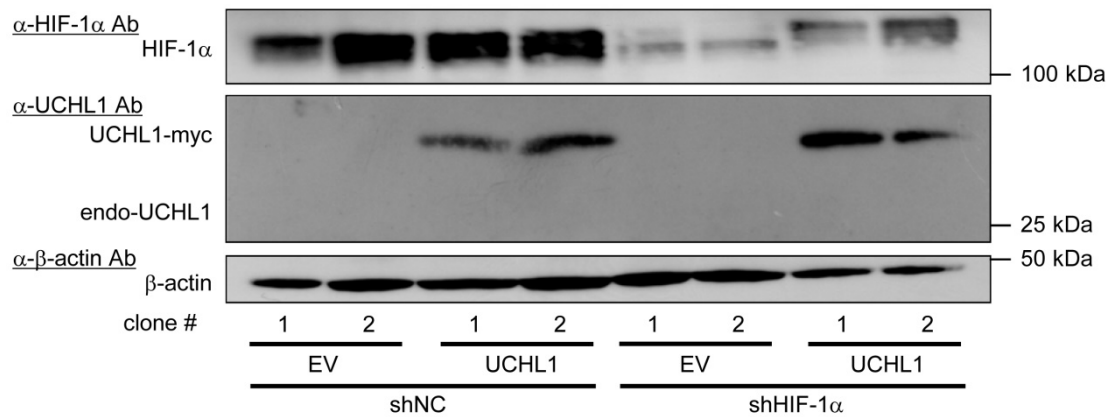

**Supplementary Figure 13. Characterization of EMT6/EF-Luc/shNC/EV, EMT6/EF-Luc/shNC/UCHL1, EMT6/EF-Luc/shHIF-1α/EV-, and EMT6/EF-Luc/shHIF-1α/UCHL1 stable transfectants.**

EMT6/EF-Luc/shNC/EV (clone #1, 2), EMT6/EF-Luc/shNC/UCHL1 (clone #1, 2), EMT6/EF-Luc/shHIF-1α/EV (clone #1, 2), and EMT6/EF-Luc/shHIF-1α/UCHL1 (clone #1, 2) cells were cultured under hypoxic conditions (0.1%) for 24 h, and subjected to Western blotting with the indicated antibodies.

## Supplementary Figure 14

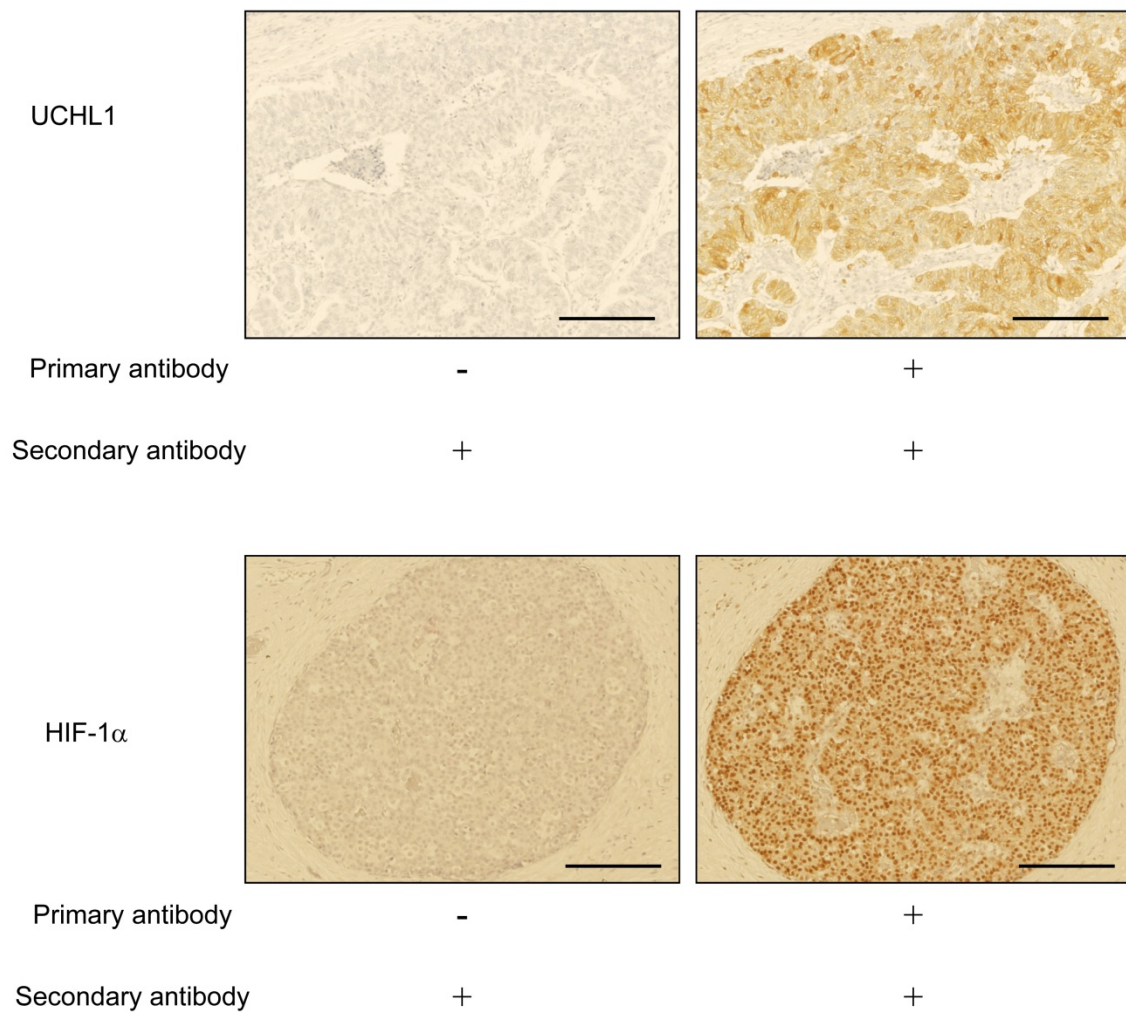

### Supplementary Figure 14. Specificity of antibodies for immunohistochemical staining.

Formalin-fixed paraffin-embedded sections of human breast tumors were subjected to immunohistochemical staining with (+) or without (-) anti-UCHL1 (upper) and anti-HIF-1 $\alpha$  (lower) antibodies.

## Supplementary Figure 15

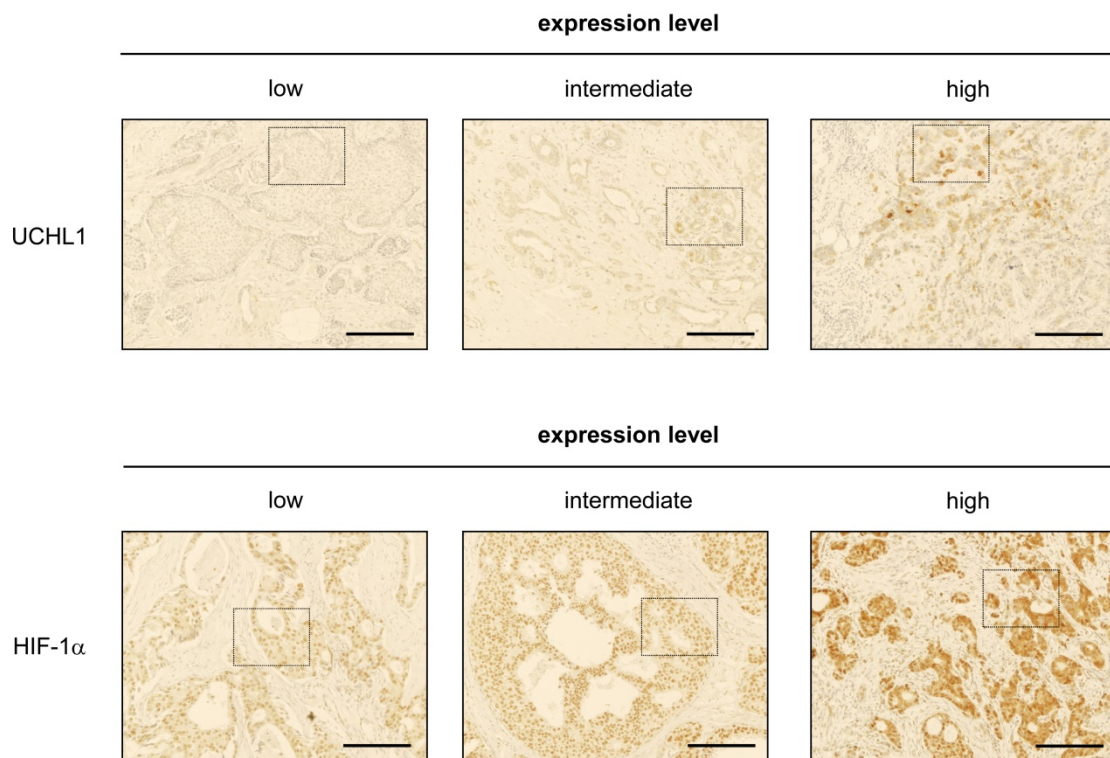

**Supplementary Figure 15. Immunohistochemical analyses of UCHL1 and HIF-1 $\alpha$  expression levels in human breast tumor sections.** Low magnification images of Figure 6a and 6b (Immunohistochemical analyses using an anti-UCHL1 antibody [upper] and anti-HIF-1 $\alpha$  antibody [lower]). Bar, 200  $\mu$ m. Dotted squares represent the areas demonstrated in Figure 6a and 6b.



## Supplementary Figure 16

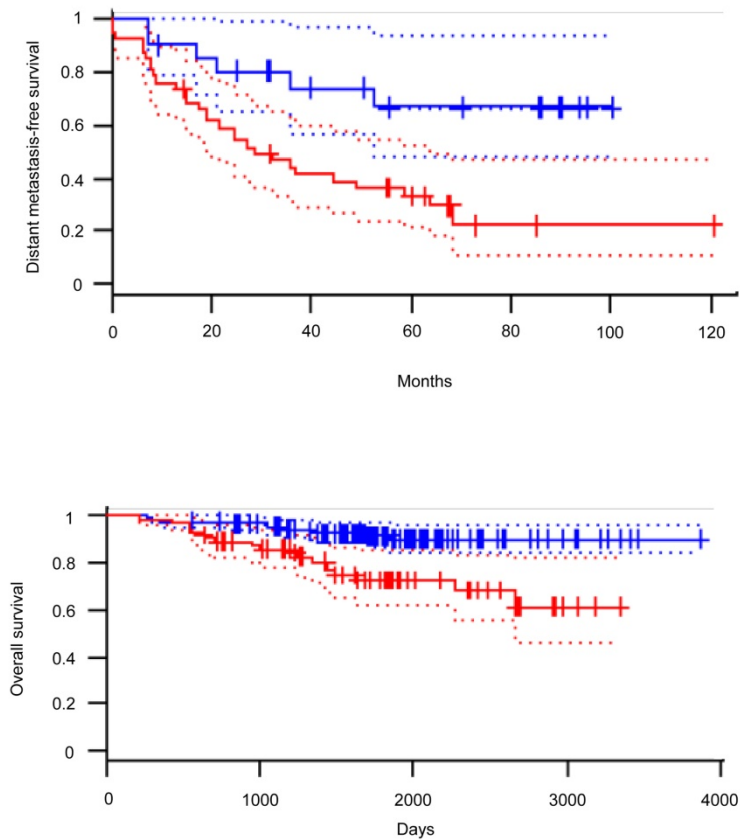

**Supplementary Figure 16. Kaplan-Meier analysis of distant metastasis-free survival and overall survival rates of melanoma and lung adenocarcinoma patients.** (a) A PrognScan database-based Kaplan-Meier analysis of the distant metastasis-free survival rates of 63 melanoma patients stratified by high (red) and low (blue) UCHL1 levels (high:  $n = 42$ , low:  $n = 21$ ). (b) A PrognScan database-based Kaplan-Meier analysis of the overall survival rates of 204 lung adenocarcinoma patients stratified by high (red) and low (blue) UCHL1 levels (high:  $n = 73$ , low:  $n = 131$ ).

## Supplementary Figure 17

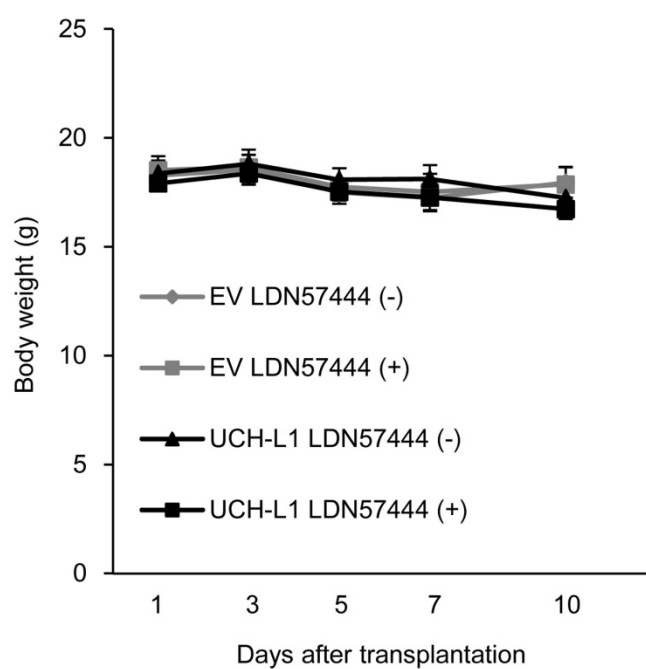

**Supplementary Figure 17. No apparent side-effects due to the UCHL1 inhibitor.** Changes in the body weights of EMT6/EF-Luc/EV- and EMT6/EF-Luc/UCHL1-tumor-bearing mice on the indicated days after the administration of DMSO and LDN57444. Mean  $\pm$ s.d. n = 6.

## Supplementary Figure 18

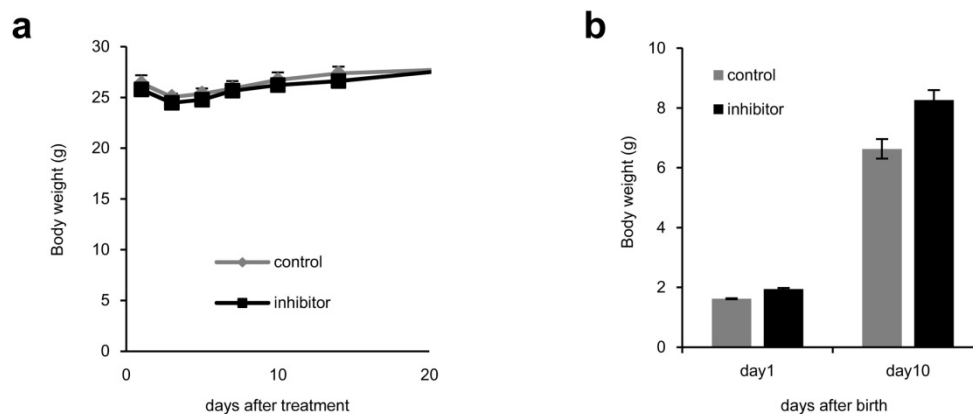

**Supplementary Figure 18. No apparent side effects due to the UCHL1 inhibitor. (a)** Changes in the body weights of 10-week-old BALB/c mice after the administration of DMSO or LDN57444 (0.5 mg/kg i.p.) on days 1, 3, and 5. Mean  $\pm$  s.d. n = 4. **(b)** Ten-week-old male and female mice (4 pairs of BALB/c) were crossed for one week with the i.p. administration of DMSO or LDN57444 (0.5 mg/kg i.p.) on days 1, 3, and 5. The body weights of the resultant neonatal mice were measured 1 and 10 days after birth.

## Supplementary Figure 19

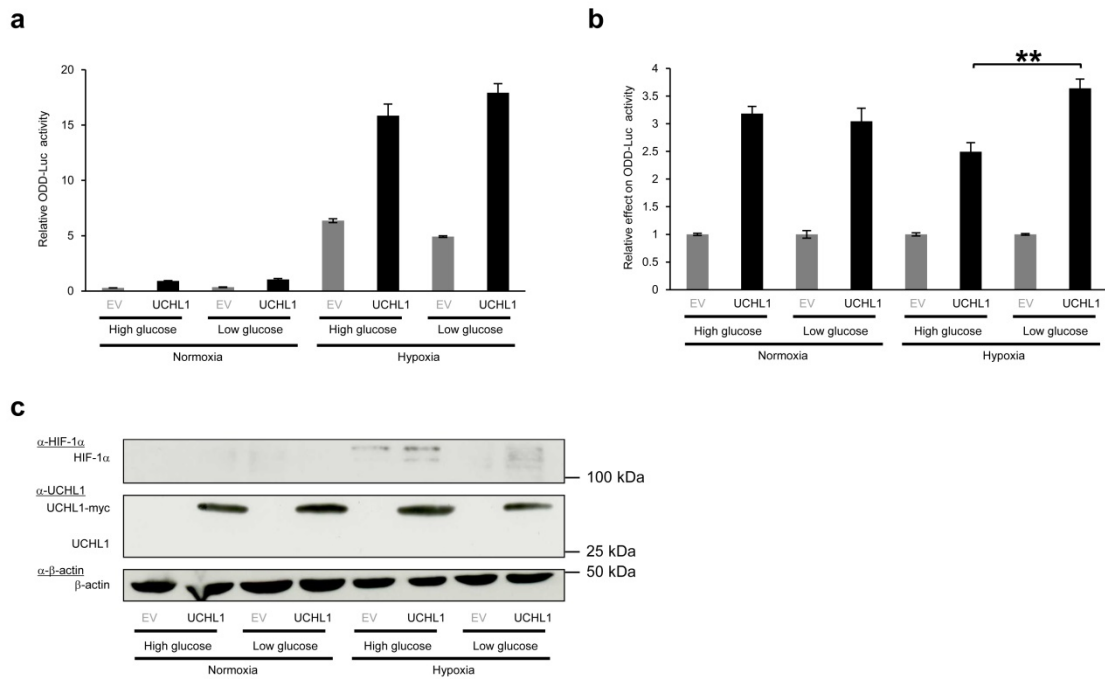

**Supplementary Figure 19. UCHL1 efficiently stabilized the ODD-fusion protein under low glucose and hypoxic conditions.** HeLa/ODD-Luc cells were transfected with either the UCHL1-expression vector, pcDNA4/UCHL1 (UCHL1), or its empty vector, pcDNA4/myc-His A (EV), and cultured in culture medium containing a low (0.45 g/L) or high (4.5 g/L) concentration of glucose under normoxic or hypoxic conditions for 24 h. **(a,b)** Cells were subjected to luciferase assay. Relative ODD-Luc activity in **a** was calculated as a ratio of *firefly* luciferase activity from the ODD-Luc expression vector to *renilla* luciferase activity from the internal control pRL-SV40. Relative effect on ODD-Luc activity in **b** was calculated as a ratio of the relative activity with UCHL1 transfection to that with EV transfection under each culture condition. Mean  $\pm$  s.d. n = 3, \*p < 0.01, NS = not significant (Student's *t*-test between the 2 indicated groups). **(c)** Cells were then subjected to Western blotting for the indicated proteins.

## Supplementary Figure 20

Fig. 1a left ( $\alpha$ -UCHL1 Ab)

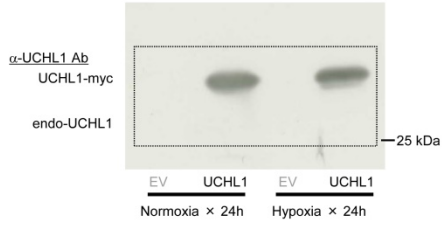

Fig. 1a left ( $\alpha$ - $\beta$ -actin Ab)

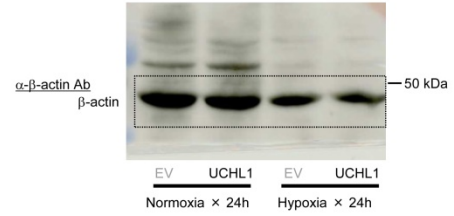

Fig. 1a right ( $\alpha$ -UCHL1 Ab)

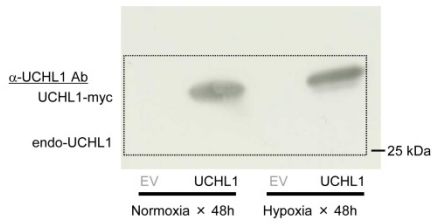

Fig. 1a right ( $\alpha$ - $\beta$ -actin Ab)

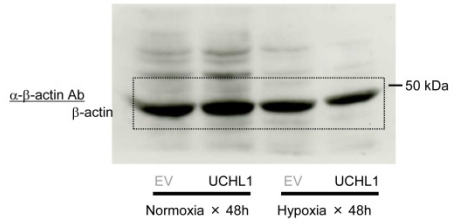

Fig. 1b left ( $\alpha$ -UCHL1 Ab)

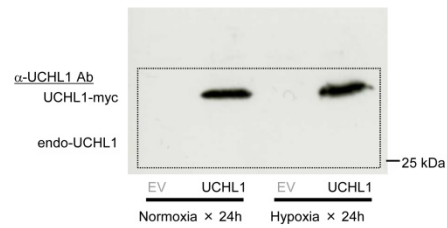

Fig. 1b left ( $\alpha$ - $\beta$ -actin Ab)

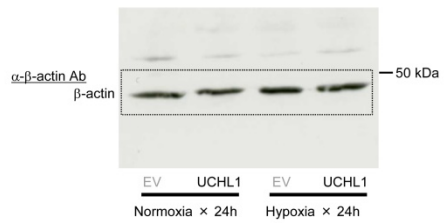

Fig. 1b left ( $\alpha$ -UCHL1 Ab)

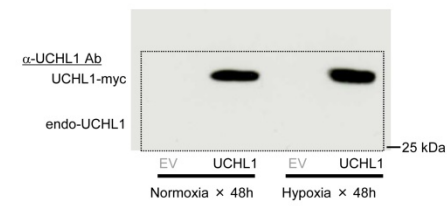

Fig. 1b left ( $\alpha$ - $\beta$ -actin Ab)

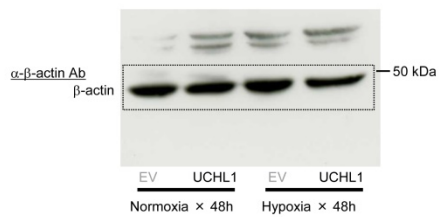

Fig. 1d ( $\alpha$ -UCHL1 Ab)

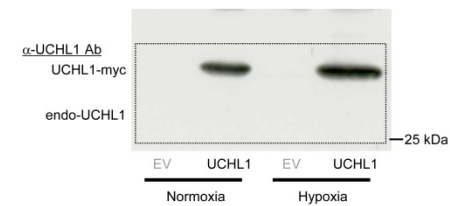

Fig. 1d ( $\alpha$ - $\beta$ -actin Ab)

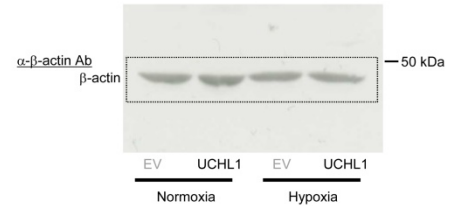

Supplementary Figure 20. Full blots of the indicated figures.

Fig. 2a ( $\alpha$ -HIF1 $\alpha$  Ab)

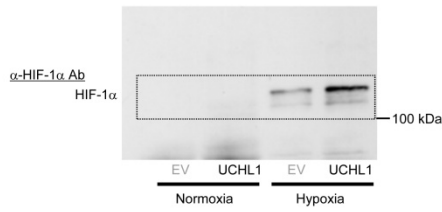

Fig. 2a ( $\alpha$ -UCHL1 Ab)

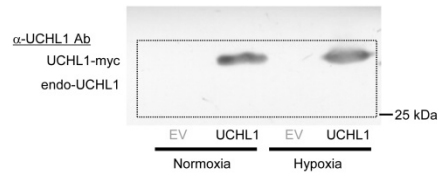

Fig. 2a ( $\alpha$ - $\beta$ -actin Ab)

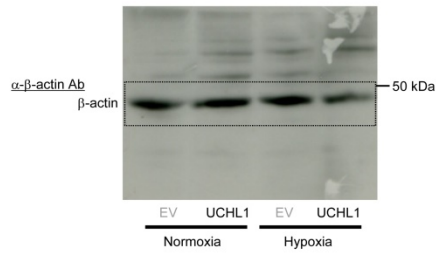

Fig. 2b ( $\alpha$ -HIF1 $\alpha$  Ab)

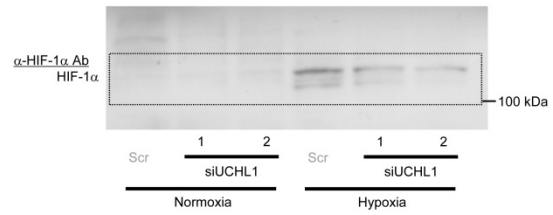

Fig. 2b ( $\alpha$ - $\beta$ -actin Ab)

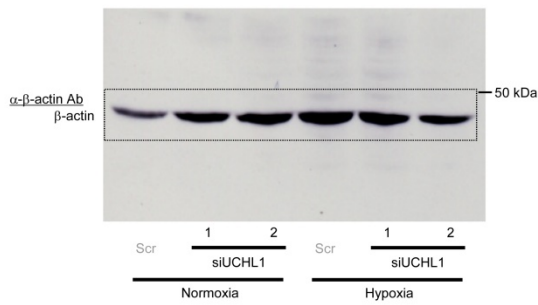

Fig. 2c left ( $\alpha$ -UCHL1 Ab)

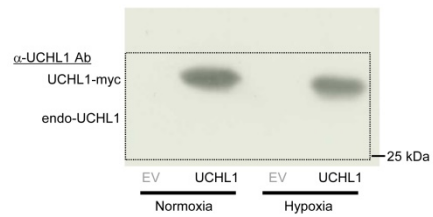

Fig. 2c left ( $\alpha$ - $\beta$ -actin Ab)

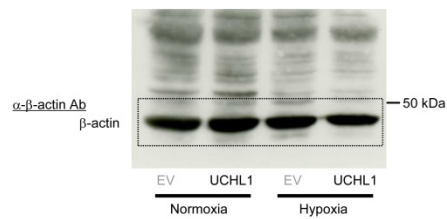

Fig. 2c right ( $\alpha$ -UCHL1 Ab)

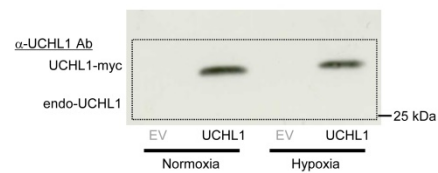

Fig. 2c right ( $\alpha$ - $\beta$ -actin Ab)

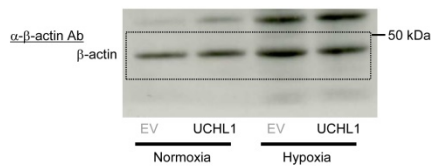

Fig. 2e ( $\alpha$ -HIF1 $\alpha$  Ab)

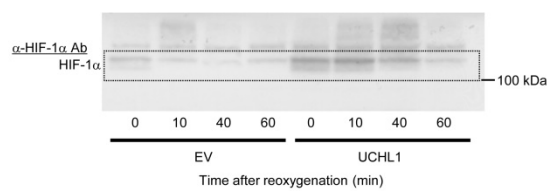

Supplementary Figure 20 continued.

Fig. 2e ( $\alpha$ -UCHL1 Ab)

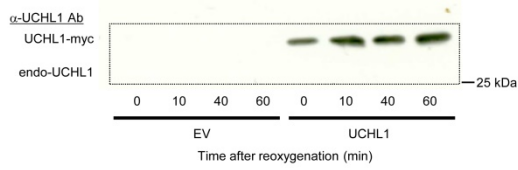

Fig. 2e ( $\alpha$ - $\beta$ -actin Ab)

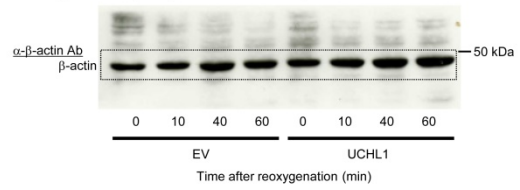

Fig. 2f ( $\alpha$ -HIF1 $\alpha$  Ab)

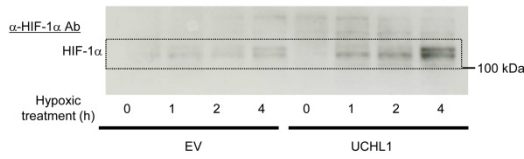

Fig. 2f ( $\alpha$ -UCHL1 Ab)

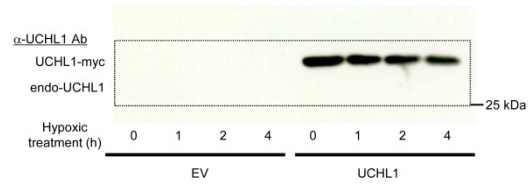

Fig. 2f ( $\alpha$ - $\beta$ -actin Ab)

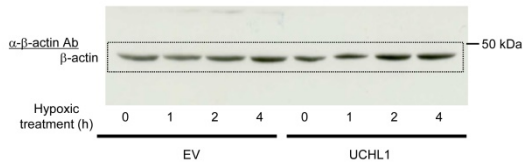

Fig. 3a ( $\alpha$ -UCHL1 Ab)

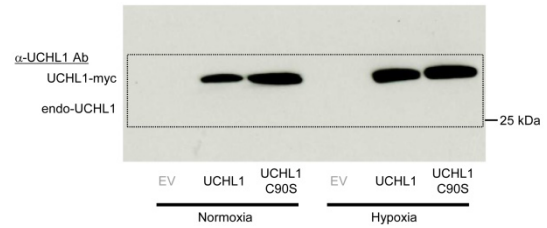

Fig. 3a ( $\alpha$ - $\beta$ -actin Ab)

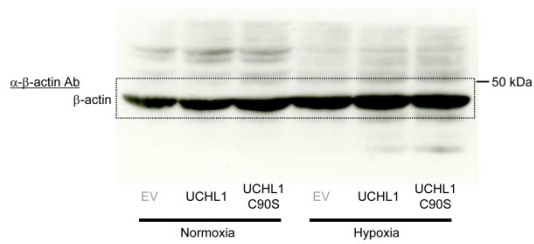

Fig. 3b ( $\alpha$ -UCHL1 Ab)

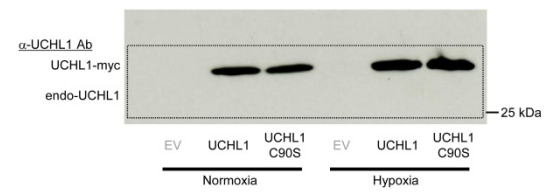

Fig. 3b ( $\alpha$ - $\beta$ -actin Ab)

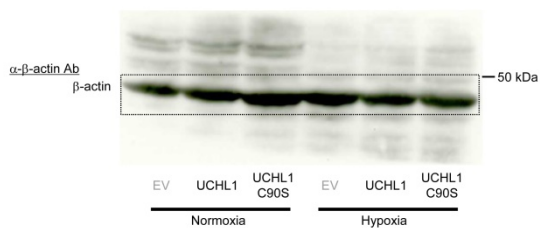

Supplementary Figure 20 continued.

Fig. 3c ( $\alpha$ -Ubiquitin Ab)

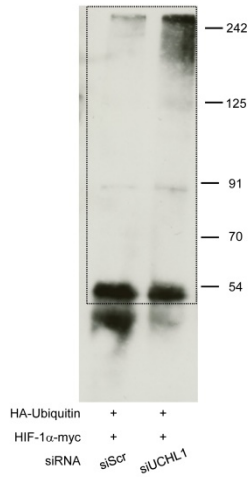

Fig. 3c ( $\alpha$ -myc Ab)

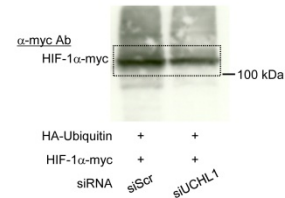

Fig. 3c ( $\alpha$ -UCL1 Ab)

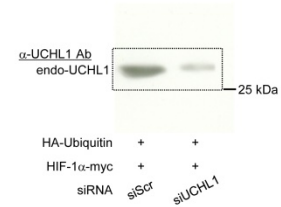

Fig. 3c ( $\alpha$ - $\beta$ -actin Ab)

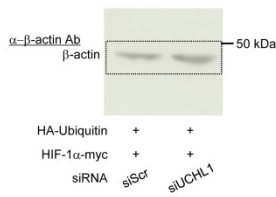

Fig. 3d ( $\alpha$ -HIF1 $\alpha$  Ab)

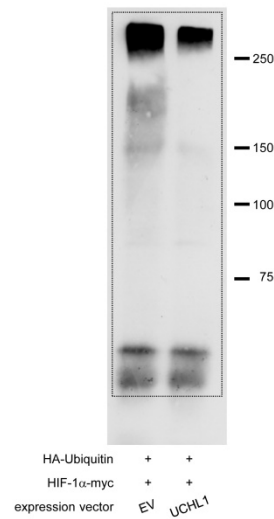

Fig. 3d ( $\alpha$ -myc Ab)

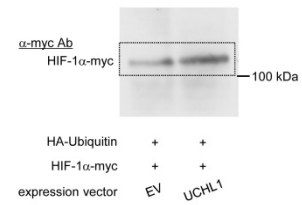

Fig. 3d ( $\alpha$ -UCL1 Ab)

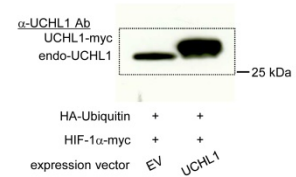

Fig. 3d ( $\alpha$ - $\beta$ -actin Ab)

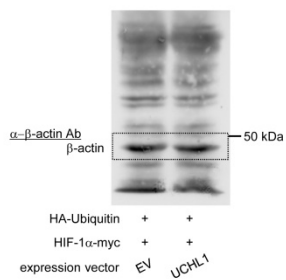

Fig. 3e  $\alpha$ -UHIF-1 $\alpha$  Ab

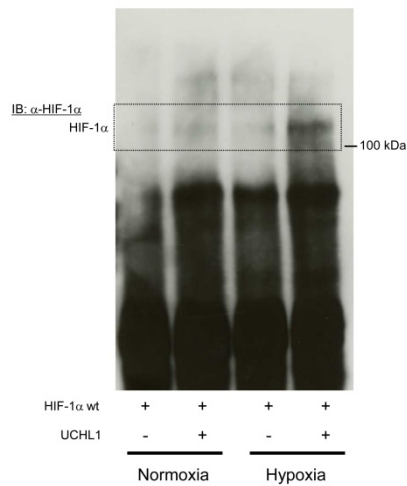

Fig. 3e  $\alpha$ -UHIF-1 $\alpha$  Ab

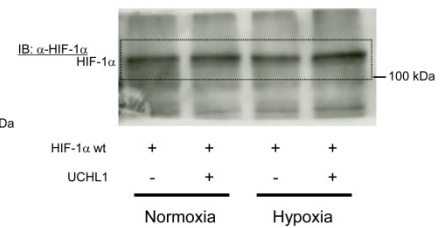

Supplementary Figure 20 continued.



Fig. 3e  $\alpha$ -UCHL1 Ab

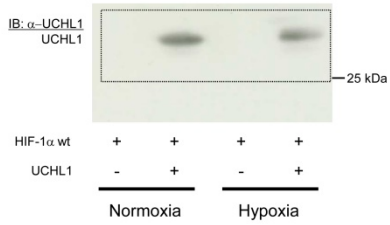

Fig. 3e  $\alpha$ - $\beta$ -actin Ab

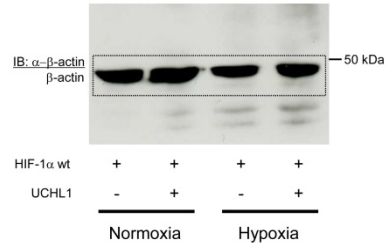

Fig. 3f ( $\alpha$ -HIF1 $\alpha$  Ab)

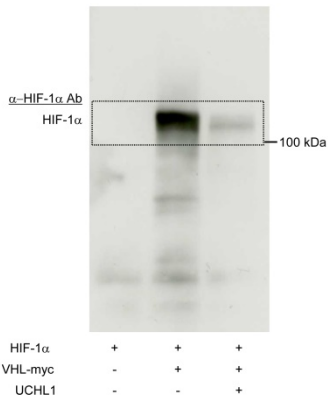

Fig. 3f ( $\alpha$ -HIF1 $\alpha$  Ab)

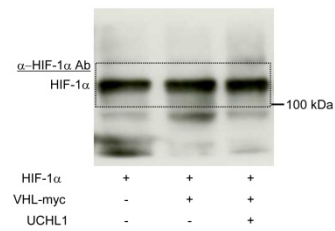

Fig. 3f ( $\alpha$ -UCHL1 Ab)

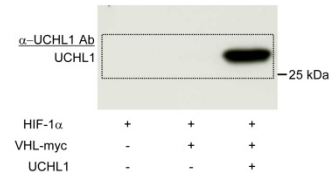

Fig. 3f ( $\alpha$ -myc Ab)

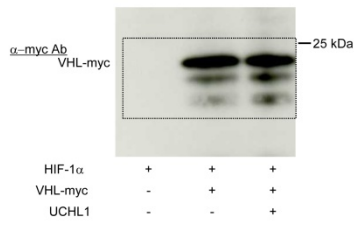

Fig. 3f ( $\alpha$ - $\beta$ -actin Ab)

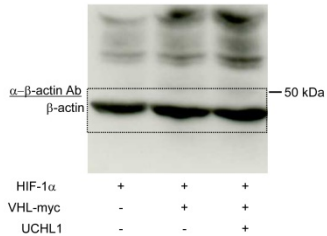

Fig. 3g left ( $\alpha$ -UCHL1 Ab)

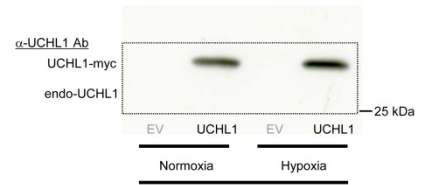

Fig. 3g left ( $\alpha$ - $\beta$ -actin Ab)

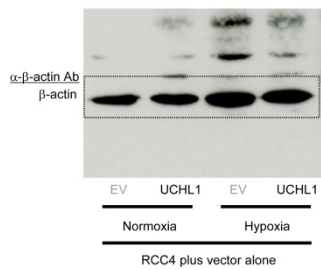

Fig. 3g right ( $\alpha$ -UCHL1 Ab)

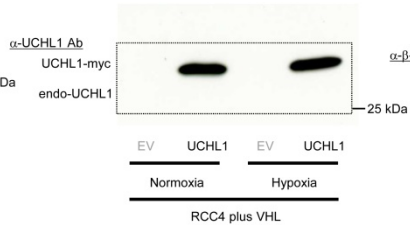

Fig. 3g right ( $\alpha$ - $\beta$ -actin Ab)

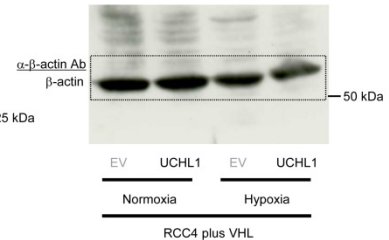

Supplementary Figure 20 continued.

Fig. 3h left ( $\alpha$ -HIF1 $\alpha$  Ab)

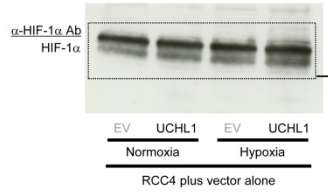

Fig. 3h left ( $\alpha$ -UCHL1 Ab)

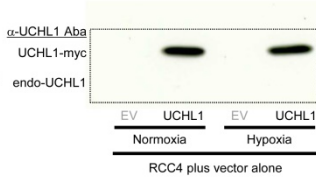

Fig. 3h left ( $\alpha$ - $\beta$ -actin Ab)

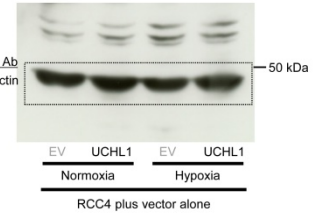

Fig. 3h right ( $\alpha$ -HIF1 $\alpha$  Ab)

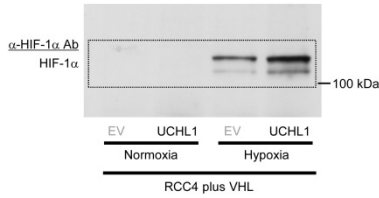

Fig. 3h right ( $\alpha$ -UCHL1 Ab)

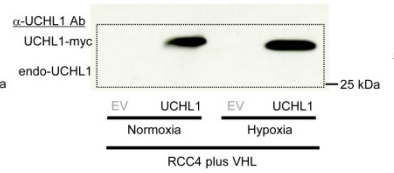

Fig. 3h right ( $\alpha$ - $\beta$ -actin Ab)

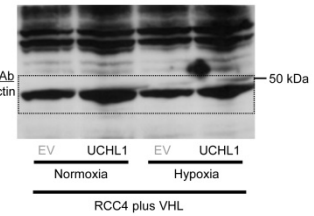

Fig. 4a ( $\alpha$ -UCHL1 Ab)

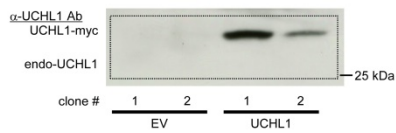

Fig. 4a ( $\alpha$ - $\beta$ -actin Ab)

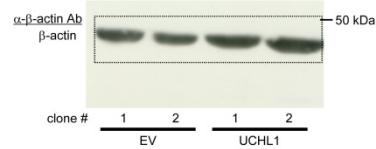

Fig. 4f ( $\alpha$ -UCHL1 Ab)

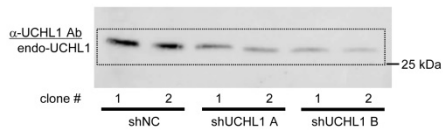

Fig. 4f ( $\alpha$ - $\beta$ -actin Ab)

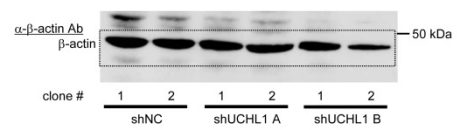

Fig. 7c ( $\alpha$ -UCHL1 Ab)

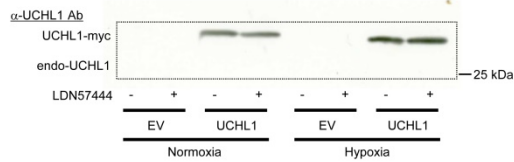

Fig. 7c ( $\alpha$ - $\beta$ -actin Ab)

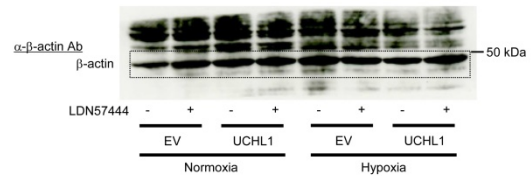

Supplementary Figure 20 continued.

Supplementary Fig. 2  
( $\alpha$ -UCHL1 Ab)

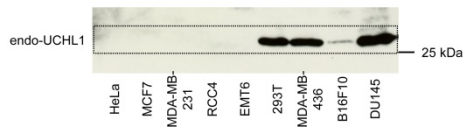

Supplementary Fig. 2  
( $\alpha$ - $\beta$ -actin Ab)

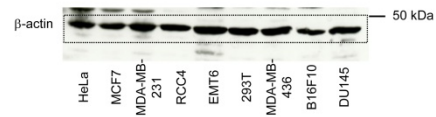

Supplementary Fig. 3  
( $\alpha$ -UCHL1 Ab)

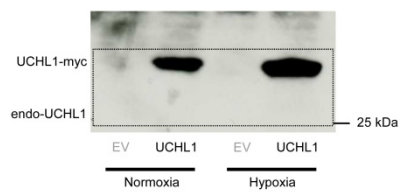

Supplementary Fig. 3  
( $\alpha$ - $\beta$ -actin Ab)

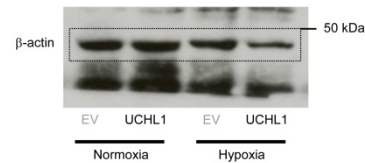

Supplementary Fig. 6  
( $\alpha$ -UCHL1 Ab)

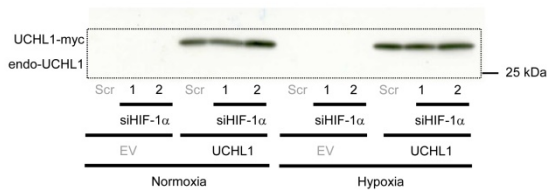

Supplementary Fig. 6  
( $\alpha$ - $\beta$ -actin Ab)

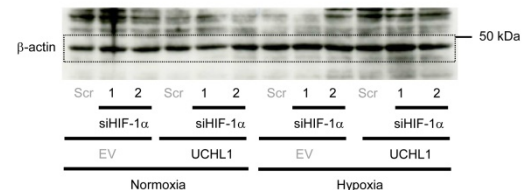

Supplementary Fig. 8 left  
( $\alpha$ -UCHL1 Ab)

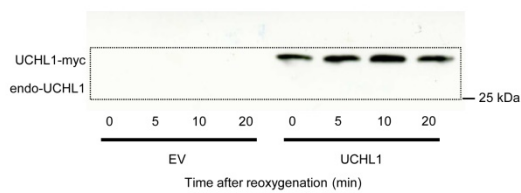

Supplementary Fig. 8 left  
( $\alpha$ - $\beta$ -actin Ab)

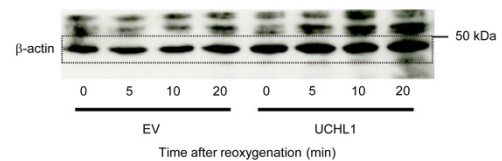

Supplementary Fig. 8 right  
( $\alpha$ -UCHL1 Ab)

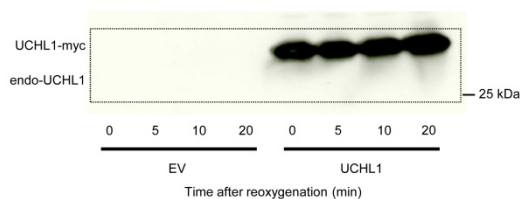

Supplementary Fig. 8 right  
( $\alpha$ - $\beta$ -actin Ab)

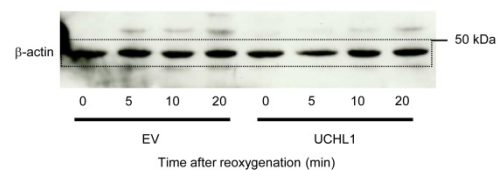

Supplementary Figure 20 continued.

Supplementary Fig. 9  
( $\alpha$ -Ubiquitin Ab)

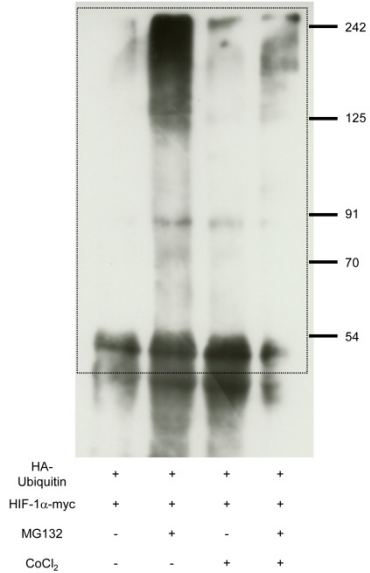

Supplementary Fig. 9  
( $\alpha$ -HIF-1 $\alpha$  Ab)

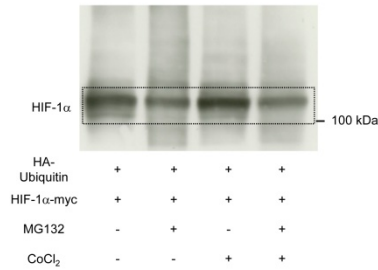

Supplementary Fig. 9  
( $\alpha$ - $\beta$ -actin Ab)

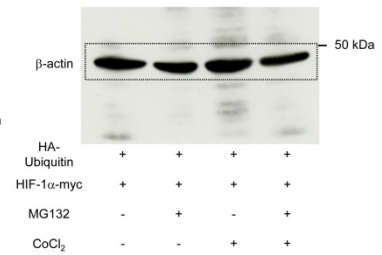

Supplementary Fig. 10a  
( $\alpha$ -HIF1 $\alpha$  Ab)

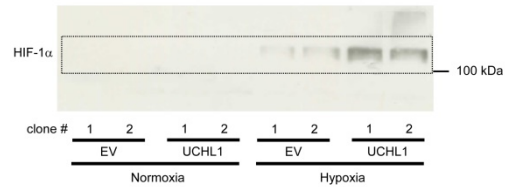

Supplementary Fig. 10a  
( $\alpha$ -UCHL1 Ab)

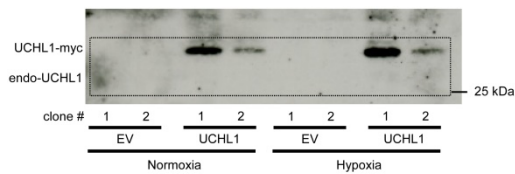

Supplementary Fig. 10a  
( $\alpha$ - $\beta$ -actin Ab)

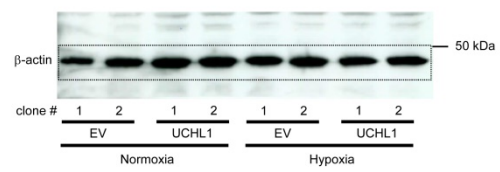

Supplementary Fig. 10b  
( $\alpha$ -UCHL1 Ab)

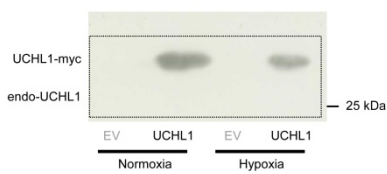

Supplementary Fig. 10b  
( $\alpha$ - $\beta$ -actin Ab)

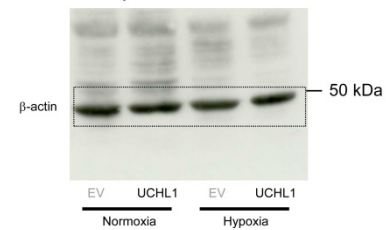

Supplementary Fig. 12b  
( $\alpha$ -HIF1 $\alpha$  Ab)

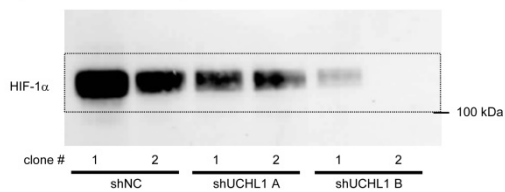

Supplementary Fig. 12b  
( $\alpha$ -UCHL1 Ab)

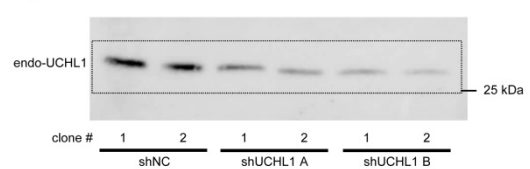

Supplementary Figure 20 continued.

Supplementary Fig. 12b  
( $\alpha$ - $\beta$ -actin Ab)

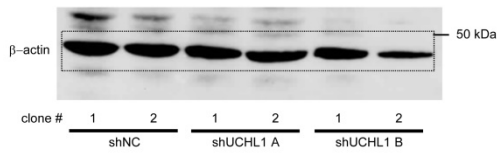

Supplementary Fig. 13  
( $\alpha$ -HIF1 $\alpha$  Ab)

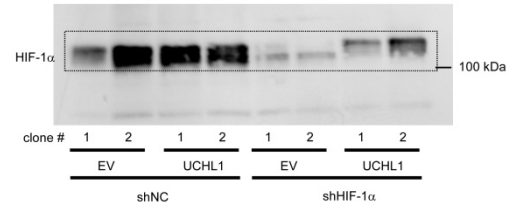

Supplementary Fig. 13  
( $\alpha$ -UCHL1 Ab)

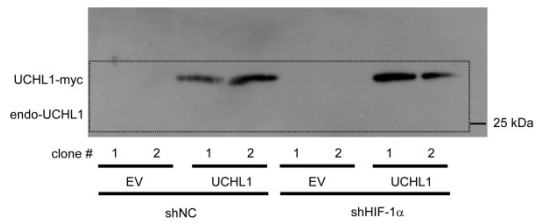

Supplementary Fig. 13  
( $\alpha$ - $\beta$ -actin Ab)

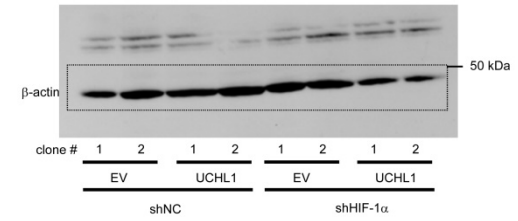

Supplementary Fig. 19b  
( $\alpha$ -HIF-1 $\alpha$  Ab)

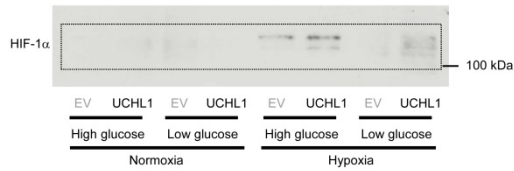

Supplementary Fig. 19b  
( $\alpha$ -UCHL1 Ab)

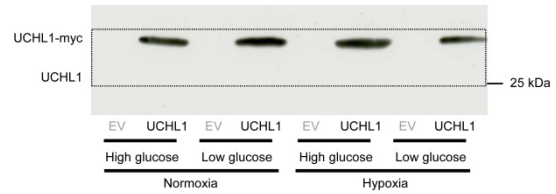

Supplementary Fig. 19b  
( $\alpha$ - $\beta$ -actin Ab)

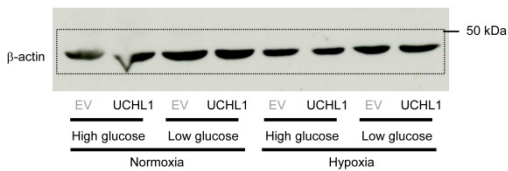

Supplementary Figure 20 continued.
